## Management of Nanostim leadless pacemaker early-life battery failures. A single center experience

Oosterwerff F.; Salavati A.; Adiyaman A.; Ghani A.; Smit JJJ; Ramdat Misier A.; Delnoy PPHM; Elvan A.

Isala Clinics, Zwolle, Netherlands (The)

**Funding Acknowledgements:** Type of funding sources: None.

**Background/introduction** Early studies of the Nanostim leadless pacemaker demonstrated technical feasibility effective pacing performance at the short-term. However, recently the Nanostim proved to be susceptible to early-life battery failures.

**Purpose** In this study, we addressed the following research questions:

- 1) What percentage of Nanostim LPs experience early-life battery failure?
- 2) Is Nanostim extraction and subsequent pacemaker reimplantation safe and effective?
- 3) Is three monthly follow-up under the Nanostim advisory effective at preventing Nanostim LP related in-between hospitalizations?

**Methods** In a retrospective study, we collected data of 49 Nanostim implanted patients with a mean follow up of 3 ( $\pm 1.5$ ) years at our tertiary hospital.

**Results** Nanostim early-life battery failure in our population was 37% (18/49). Extraction of 14 Nanostim pacemakers (device age  $1040 \pm 467$  days) in an older population ( $80 \pm 7$  years) was safe (0 complications) and effective (80% extraction success, 100% reimplantation success). All known cases of early-life battery failure were identified during the three monthly follow-up consultations.

**Conclusions** Nanostim LP early-life battery failure is substantially higher than previously reported.

In case of dysfunction Nanostim extraction in an older population is safe and effective. Three monthly follow-up is effective at preventing in-between Nanostim related hospitalization.

Abstract Figure. Management of Nanostim battery failure

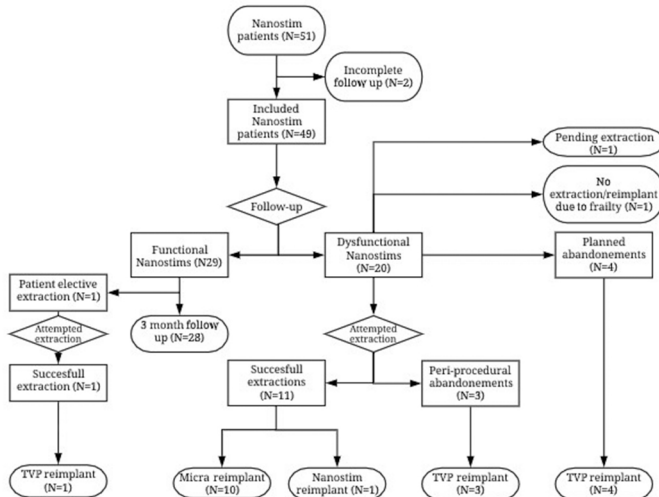

Source: http://academic.oup.com/europace/article-pdf/23/Supplement_3/euab116.378/38131724/euab116.378.pdf
